# Supplementary material for: The predictive value of C-reactive protein / albumin ratio and sarcopenia index for frequent acute exacerbation events in patients with chronic obstructive pulmonary disease
Source: Research Square preprint supplement (doi:10.21203/rs.3.rs-8504654/v1), 2026-02-02
Supplement: Supplementary file 1 [file c0f6a6c6bbdeb364a7dcec72.pdf]

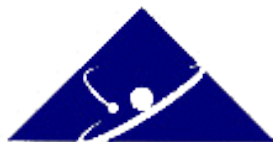

|        |                    |
|--------|--------------------|
| 项目批准号  | 82274500           |
| 申请代码   | H3108              |
| 归口管理部门 |                    |
| 依托单位代码 | 23003808A0018-0030 |

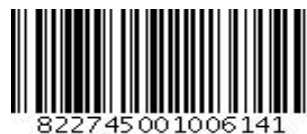

822745001006141

# 国家自然科学基金 资助项目计划书 (预算制项目)

资助类别：面上项目

亚类说明：

附注说明：

项目名称：基于miRNA-146a调节TLR4/NF- $\kappa$ B通路探讨益肺健脾方对慢阻肺气道炎症的作用机制

直接费用：52万元 执行年限：2023.01-2026.12

负责人：王胜

通讯地址：安徽省合肥市新站区龙子湖路350号

邮政编码：230012 电 话：0551-62850162

电子邮件：ahzyws@163.com

依托单位：安徽中医药大学

联系人：王雷 电 话：0551-68129064

填表日期：2022年09月21日

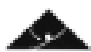

## 国家自然科学基金资助项目计划书填报说明 （预算制项目）

- 一、项目负责人收到《国家自然科学基金资助项目批准通知》（以下简称《批准通知》）后，请认真阅读本填报说明，参照国家自然科学基金相关项目管理办​​法和新修订的《国家自然科学基金资助项目资金管理办法》（以下简称《资金管理办法》，请查阅国家自然科学基金委员会官方网站首页“政策法规”栏目），按《批准通知》的要求认真填写和提交《国家自然科学基金资助项目计划书》（以下简称《计划书》）。
- 二、填写《计划书》时要科学严谨、实事求是、表述清晰、准确。《计划书》经国家自然科学基金委员会相关项目管理部门审核批准后，将作为项目研究计划执行、检查和验收的依据。
- 三、《计划书》各部分填写要求如下：
  - （一）简表：由系统自动生成。
  - （二）摘要及关键词：各类获资助项目都应当填写中、英文摘要及关键词。
  - （三）项目组主要成员：计划书中列出姓名的项目组主要成员由系统自动生成，与申请书原成员保持一致，不可随意调整。如果《批准通知》所附“项目评审意见及修改意见表”中“修改意见”栏目有调整项目组成员相关要求的，待项目开始执行后，按照项目成员变更程序另行办理。
  - （四）资金预算表：根据批准的项目资助额度，按规定调整项目预算，并按照《国家自然科学基金项目计划书预算表编制说明》填报资金预算表和预算说明书。
  - （五）正文：
    1. 面上项目、地区科学基金项目：如果《批准通知》所附“项目评审意见及修改意见表”中“修改意见”栏目没有修改要求的，只需选择“研究内容和研究目标按照申请书执行”即可；如果《批准通知》中上述栏目明确要求调整研究期限或研究内容等的，须选择“根据研究方案修改意见更改”并填报相关修改内容。
    2. 重点项目、重点国际（地区）合作研究项目、重大项目、国家重大科研仪器研制项目、原创探索计划项目：须选择“根据研究方案修改意见更改”，根据《批准通知》的要求填写研究（研制）内容，不得自行降低、更改研究目标（或仪器研制的技术性能与主要技术指标、验收技术指标等）或缩减研究（研制）内容。此外，还要突出以下几点：
      - （1）研究的难点和在实施过程中可能遇到的问题（或仪器研制风险），拟采用的研究（研制）方案和技术路线；
      - （2）项目主要参与者分工，合作研究单位（如有）之间的关系与分工，重大项目还需说明课题之间的关联；
      - （3）详细的年度研究（研制）计划。
    3. 创新研究群体项目：须选择“根据研究方案修改意见更改”，按下列提纲撰写：
      - （1）研究方向；

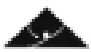

- (2) 结合国内外研究现状，说明研究工作的学术思想和科学意义（限两个页面）；
  - (3) 研究内容、研究方案及预期目标（限两个页面）；
  - (4) 年度研究计划；
  - (5) 研究队伍的组成情况。
4. 基础科学中心项目：须选择“根据研究方案修改意见更改”，根据《批准通知》的要求和现场考察专家组的意见和建议，进一步完善并细化研究计划，按下列提纲撰写：
  - (1) 五年拟开展的研究工作（包括主要研究方向、关键科学问题与研究内容）；
  - (2) 研究方案（包括骨干成员之间的分工及合作方式、学科交叉融合研究计划等）；
  - (3) 年度研究计划；
  - (4) 五年预期目标和可能取得的重大突破等；
  - (5) 研究队伍的组成情况。
5. 对于其他类型项目，参照面上项目的方式进行选择和填写。

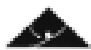

简表

|         |           |                                                |     |   |      |                      |     |               |
|---------|-----------|------------------------------------------------|-----|---|------|----------------------|-----|---------------|
| 项目负责人信息 | 姓 名       | 王胜                                             | 性 别 | 男 | 出生年月 | 1970年10月             | 民 族 | 汉族            |
|         | 学 位       | 博士                                             |     |   | 职称   | 主任医师                 |     |               |
|         | 是否在站博士后   | 否                                              |     |   | 电子邮件 | ahzyws@163.com       |     |               |
|         | 电 话       | 0551-62850162                                  |     |   | 个人网页 |                      |     |               |
|         | 工 作 单 位   | 安徽中医药大学                                        |     |   |      |                      |     |               |
|         | 所 在 院 系 所 | 第一附属医院                                         |     |   |      |                      |     |               |
| 依托单位信息  | 名 称       | 安徽中医药大学                                        |     |   |      |                      | 代码  | 23003808A0018 |
|         | 联 系 人     | 王雷                                             |     |   | 电子邮件 | wanglei@ahtcm.edu.cn |     |               |
|         | 电 话       | 0551-68129064                                  |     |   | 网站地址 | www.ahtcm.edu.cn     |     |               |
| 合作单位信息  | 单 位 名 称   |                                                |     |   |      |                      |     |               |
|         | 安徽医科大学    |                                                |     |   |      |                      |     |               |
| 项目基本信息  | 项 目 名 称   | 基于miRNA-146a调节TLR4/NF-κB通路探讨益肺健脾方对慢阻肺气道炎症的作用机制 |     |   |      |                      |     |               |
|         | 资 助 类 别   | 面上项目                                           |     |   |      | 亚 类 说 明              |     |               |
|         | 附 注 说 明   |                                                |     |   |      |                      |     |               |
|         | 申 请 代 码   | H3108:中医内科学                                    |     |   |      |                      |     |               |
|         | 基 地 类 别   |                                                |     |   |      |                      |     |               |
|         | 执 行 年 限   | 2023.01-2026.12                                |     |   |      |                      |     |               |
|         | 直 接 费 用   | 52万元                                           |     |   |      |                      |     |               |

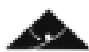

## 项目摘要

### 中文摘要:

慢阻肺患者存在不同程度的气道炎症，但其发生机制尚未明确阐明。TLR4/NF- $\kappa$ B信号通路参与慢阻肺气道炎症，并诱导气道上皮细胞MUC5AC表达，导致黏液高分泌。miRNA-146a是炎症细胞及黏液高分泌重要调节因子，负性调控TLR4信号通路抑制炎症细胞及粘液蛋白分泌。前期研究发现临床验方益肺健脾方降低慢阻肺模型大鼠肺组织TLR4、NF- $\kappa$ B、MUC5AC等表达，减少慢阻肺患者痰液炎细胞分泌，分析NF- $\kappa$ B信号通路是该方治疗慢阻肺的关键靶标，并证实miRNA-146a在慢阻肺及正常人体血清内的差异表达。故提出“益肺健脾方通过调控miRNA-146a，影响TLR4/NF- $\kappa$ B信号传导，干扰炎症因子释放，减少黏蛋白表达，从而抑制慢阻肺气道炎症和黏液高分泌”的假说。通过制备慢阻肺体内外模型，运用基因干扰、外源基因表达等技术，揭示该方治疗慢阻肺气道炎症及黏液高分泌的分子机制，为提高临床疗效提供依据。

### Abstract:

There are different degrees of airway inflammation in copd patients, but its mechanism has not been clearly clarified. TLR4/NF- $\kappa$ B signaling pathway is involved in copd airway inflammation and induces MUC5AC expression in airway epithelial cells, leading to mucus hypersecretion. Mirna-146a is an important regulator of inflammatory cells and mucus hypersecretion, and negatively regulates TLR4 signaling pathway to inhibit inflammatory cells and mucus protein secretion. Previous studies have found that yifei Jianpi Prescription reduces the expression of TLR4, NF- $\kappa$ B and MUC5AC in the lung tissues of copd model rats, and reduces the secretion of inflammatory cells in the sputum of COPD patients. Analysis of NF- $\kappa$ B signaling pathway is the key target of this prescription in the treatment of COPD, and the differential expression of mirNA-146a in COPD and normal human serum was confirmed. Therefore, the hypothesis that "Yifei Jianpi prescription can regulate mirNA-146a, affect TLR4/NF- $\kappa$ B signal transduction, interfere with the release of inflammatory factors and reduce mucin expression, thereby inhibiting copd airway inflammation and mucus hypersecretion" was proposed. By preparing in vitro and in vivo model of COPD, gene interference and foreign gene expression techniques were used to reveal the molecular mechanism of this prescription in treating copd airway inflammation and mucus hypersecretion, providing evidence for improving clinical efficacy.

**关键词(用分号分开):** 慢阻肺; 微小RNA-146a; TLR4/NF- $\kappa$ B通路; 益肺健脾方

**Keywords(用分号分开):** COPD; miRNA-146a; TLR4/NF- $\kappa$ B pathway; Yifei jianpi Recipe

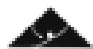

## 项目组主要成员

| 编号  | 姓名  | 出生年月    | 性别 | 职称   | 学位 | 单位名称    | 电话            | 证件号码               | 项目分工     | 每年工作时间（月） |     |  |     |  |
|-----|-----|---------|----|------|----|---------|---------------|--------------------|----------|-----------|-----|--|-----|--|
| 1   | 王胜  | 1970.10 | 男  | 主任医师 | 博士 | 安徽中医药大学 | 0551-62850162 | 34010419701030355X | 项目负责人    | 4         |     |  |     |  |
| 2   | 王传博 | 1977.07 | 男  | 主任医师 | 硕士 | 安徽医科大学  | 0551-63869450 | 340621197707165031 | 研究方案设计   | 4         |     |  |     |  |
| 3   | 张星星 | 1985.09 | 女  | 主治医师 | 博士 | 安徽中医药大学 | 0551-62850162 | 340811198509216320 | 体内疗效研究   | 6         |     |  |     |  |
| 4   | 方莉  | 1985.10 | 女  | 主治医师 | 硕士 | 安徽中医药大学 | 0551-62850057 | 342622198510090446 | 体外分子机制研究 | 6         |     |  |     |  |
| 5   | 郑莉莉 | 1991.02 | 女  | 医师   | 硕士 | 安徽中医药大学 | 0551-62850162 | 342622199102082441 | 指导并协助研究生 | 6         |     |  |     |  |
| 总人数 |     |         | 高级 |      | 中级 |         | 初级            |                    | 博士后      |           | 博士生 |  | 硕士生 |  |
| 8   |     |         | 2  |      | 2  |         | 1             |                    | 0        |           | 1   |  | 2   |  |



## 国家自然科学基金预算制项目预算表

项目批准号：82274500

项目负责人：王胜

金额单位：万元

| 序号 | 科目名称           | 金额      |
|----|----------------|---------|
| 1  | 一、基金资助项目直接费用合计 | 52.0000 |
| 2  | 1、设备费          | 0.0000  |
| 3  | 其中：设备购置费       | 0.0000  |
| 4  | 2、业务费          | 49.3000 |
| 5  | 3、劳务费          | 2.7000  |
| 6  | 二、其他来源资金       | 0.0000  |
| 7  | 三、合计           | 52.0000 |

注：请按照项目研究实际需要合理填写各科目预算金额。



## 预算说明书

（请按照《国家自然科学基金项目计划书预算表编制说明》等的有关要求，按照政策相符性、目标相关性和经济合理性原则，实事求是编制项目预算。填报时，直接费用应按设备费、业务费、劳务费三个类别填报，每个类别结合科研任务按支出用途进行说明。填报时，对单价 $\geq 50$ 万元的设备详细说明，对单价 $< 50$ 万元的设备费用分类说明，对合作研究单位资质及资金外拨情况、自筹资金进行必要说明。）

一、设备费：0万元。

二、业务费：共计 49.3 万元

1. 材料费：主要用于购买实验所需细胞株、实验动物、药品、耗材、试剂、抗体及试剂盒等，合计 32.1万元。

(1) 实验细胞：支气管上皮细胞株5株，1000元/株 $\times 5$ 株=0.5万元；合计0.5万元。

(2) 实验动物：SD 大鼠，30元/只 $\times 200$ 只=0.6万元；miRNA-146a knock-down大鼠，1000元/只 $\times 40$ 只=4万元；动物饲养费，包括场地费、动物饲料、动物垫料需1.93万元；合计6.53万元。

(3) 实验用药：益肺健脾方草药，140元/帖 $\times 40$ 帖=0.46万；合计0.46万元；

(4) 实验耗材：包括购买细胞培养瓶、6孔板、96孔板、离心管、EP管、冻存管、蓝口瓶、封口膜、滤器、无菌吸管、移液枪头、PVDF膜、棉球、口罩、PE手套、注射器、灌胃针头、实验酒精等常用实验耗材，每年需4000元，3年共1.2万元；合计1.2万元。

(5) 实验试剂：胎牛血清，4000元/500ml/瓶 $\times 3$ 瓶/年 $\times 3$ 年=3.6万；F-12K培养基，1000元/500ml/瓶 $\times 8$ 瓶/年 $\times 3$ 年=2.4万元；CCK8试剂、液氮、青霉素-链霉素双抗溶液、胰酶细胞消化液、DMSO溶液、PBS溶液、RIPA细胞裂解液、BSA溶液、DAPI染液、SDS溶液、Tris、TEMED、丙烯酰胺、多聚甲醛、甲醇、乙醇等试剂，4000元/年 $\times 3$ 年=1.2万元；合计7.2万元。

(6) 抗体及试剂盒：LEGEND plex 多因子检测试剂盒：2000元/个 $\times 8$ 个=1.6万元；miRNA-146a mimics/inhibitor构建：3000元/个 $\times 4$ 个 $\times 2$ =2.4万元；TLR4 mimics/inhibitor构建：2000元/个 $\times 4$ 个 $\times 2$ =1.6万元；质粒构建：3000元/个 $\times 4$ 个=1.2万元；HE染色检测：200元/样本 $\times 40$ 个=0.8万元；IHC检测：一抗抗体3个，2000元/个 $\times 3$ 个=0.6万元；IHC检测试剂盒3个，2500元/个 $\times 3$ 个=0.75万元；Western Blot检测：一抗抗体12个（体外共4种实验，每种实验需要3个），2000元/个 $\times 12$ 个=2.4万元；二抗抗体12个，2000元/个 $\times 12$ 个=2.4万元；ECL发光试剂盒需6个，600元/个 $\times 6$ 个=0.36万元；RT-qPCR检测：引物0.5万元；Trizol RNA提取试剂盒，1000元/个 $\times 4$ 个=0.4万元；SYBR Green PCR Kit试剂盒，2000元/个 $\times 4$ 个=0.8万元；逆转录试剂盒，1000元/个 $\times 4$ 个=0.4万元；合计16.21万元。

2. 测试化验加工费：实验用药加工检测费：0.7万元；组织包埋费：0.5万元；基因序列测序费：1.2万元；原位杂交、IHC、IF、LEGEND plex、Western Blot、RT-qPCR检测费：4万元；合计6.4万元。

3. 燃料动力费：0万元。

4. 差旅/会议/国际合作与交流费：

项目研究过程中开展科学考察、业务调研、学术交流等所产生的外埠差旅费、交通费用，2000元/人次 $\times 2$ 人 $\times 3$ 次=1.2万元；为了组织开展学术研讨、咨询及协调项目研究工作等活动产生的会议费用，2000元/次 $\times 3$ 次=0.6万元；项目组研究人员出国费用，1万元/人次 $\times 2$ 人 $\times 2$ 次=4万元；合计5.8万元。

5. 出版/文献/信息传播/知识产权事务费：

项目研究过程中所需研究成果出版费，SCI 论文2篇，1万元/篇 $\times 2$ 篇=2万元；中文核心期刊论文出版费，4000元/篇 $\times 3$ 篇=1.2万元；项目研究所需的资料打印、复印、装订费以及文献检索费，3000元/年 $\times 3$ 年=0.9万元；专利申请事务费，预申请专利1项，2000元/项 $\times 1$ 项=0.2万元；合计5万元。

6. 其他支出：0万元。

三、劳务费：项目研究过程中支付给参与项目研究的研究生劳务费及咨询的专家的咨询费：研究生劳务费：硕士研究生3人，500元/人/月 $\times 3$ 人 $\times 6$ 个月/年 $\times 3$ 年=2.7万元；专家咨询费：0万元；合计2.7万元。注：合作单位不产生外拨经费



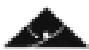

## 报告正文

研究内容和研究目标按照申请书执行。

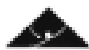

## 国家自然科学基金项目负责人、依托单位承诺书

## 国家自然科学基金项目负责人承诺书

本人郑重承诺：我接受国家自然科学基金的资助，严格遵守中共中央办公厅、国务院办公厅《关于进一步加强科研诚信建设的若干意见》《关于进一步弘扬科学家精神加强作风和学风建设的意见》《关于加强科技伦理治理的意见》等规定，及国家自然科学基金委员会关于资助项目管理、项目资金管理等各项规章，在《计划书》填写及项目执行过程中：

（一）按照《批准通知》《国家自然科学基金资助项目计划书填报说明》的要求填写《计划书》，未自行降低、更改目标任务或约定要求，或缩减研究（研制）内容；

（二）树立“红线”意识，严格履行科研合同义务，按照《计划书》负责实施本项目（批准号：82274500），切实保证研究工作时间，按时报送有关材料，及时报告重大情况变动，不违规将科研任务转包、分包他人，不以项目实施周期外或不相关成果充抵交差；

（三）遵守科研诚信、科技伦理规范和学术道德，认真开展研究工作，对资助项目发表的论著和取得的科研成果按规定进行标注，不在非本项目资助的成果或其他无关成果上标注本项目批准号，反对无实质学术贡献者“挂名”，不在成果署名、知识产权归属等方面侵占他人合法权益，并如实报告本人及项目组成员发生的违背科研诚信要求的任何行为；

（四）尊重科研规律，弘扬科学家精神，严谨求实，追求卓越，反对浮夸浮躁、投机取巧，不人为夸大学术或技术价值，不传播未经科学验证的现象和观点；

（五）将项目资金全部用于与本项目研究工作相关的支出，并结合科研活动需要，科学合理安排项目资金支出进度；

（六）做好项目组成员的教育和管理，确保遵守以上相关要求。

如违背上述承诺，本人愿接受国家自然科学基金委员会和相关部门做出的各项处理决定。

项目负责人（签字）：

年 月 日

依托单位科研管理部门：

负责人（签章）：

年 月 日

依托单位财务管理部门：

负责人（签章）：

年 月 日

## 国家自然科学基金项目依托单位承诺书

我单位同意承担上述国家自然科学基金项目，将保证项目负责人及其研究队伍的稳定和研究项目实施所需的条件，严格遵守国家自然科学基金委员会有关资助项目管理、项目资金管理、科研诚信管理和科技伦理管理等各项规定，并督促实施。

依托单位（公章）

年 月 日

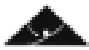

国家自然科学基金资助项目签批审核表

科学处审查意见：

负责人（签章）：  
年 月 日

科学部审查意见：

负责人（签章）：  
年 月 日

本  
栏  
目  
由  
自  
然  
科  
学  
基  
金  
委  
填  
写
